# Supplementary material for: 3D Cell Culture Models Demonstrate a Role for FGF and WNT Signaling in Regulation of Lung Epithelial Cell Fate and Morphogenesis
Source: PubMed Central journal article supplement (PMC7396690; doi:10.3389/fcell.2020.00574), 2020-07-21
Supplement: Data_Sheet_1.pdf [file Data_Sheet_1.pdf]

## *Supplementary Material*

### **Supplementary Methods**

#### **Transmission electron microscopy**

The lungospheres that formed in non-adherent conditions or in 3D Matrigel were washed in 0.1 M cacodylate buffer [0.1 M sodium cacodylate in distilled water (Sigma/Merck)], fixed with 3% glutaraldehyde for 1 h and postfixed in 1% OsO<sub>4</sub> for 50 min. The cells were washed in cacodylate buffer, embedded in 1% agar blocks, dehydrated in increasing series of ethanol (50, 70, 96, and 100%), treated with 100% acetone, and embedded in Durcupan resin (Sigma/Merck). Ultrathin sections were prepared using LKB 8802A Ultramicrotome, stained with uranyl acetate and Reynold's lead citrate (Sigma/Merck), and examined with FEI Morgagni 286(D) transmission electron microscope.

## Supplementary Figures and Tables

## Supplementary Figures

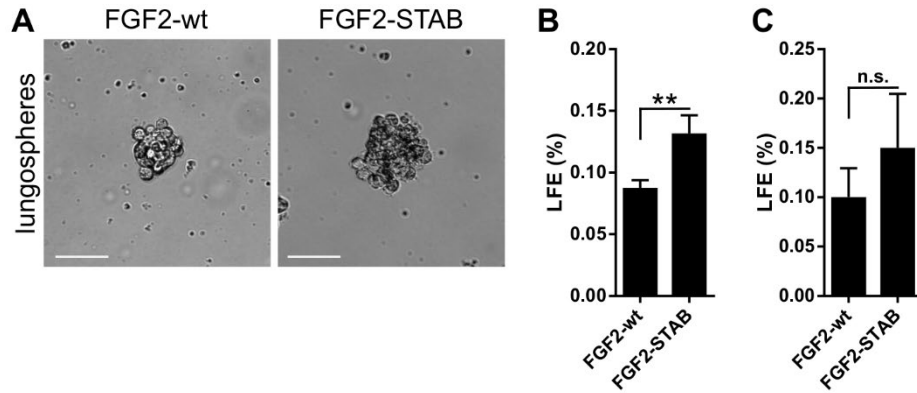

**Supplementary Figure 1. Hyperstable FGF2 promotes formation of lungospheres with higher efficiency than wild-type FGF2.** (A) Representative photographs of lungospheres formed in the presence of FGF2-wt and FGF2-STAB. Scale bars, 100  $\mu$ m. (B, C) The efficiency of primary (B) and secondary (C) lungosphere formation (LFE). The plots show mean + SD; n = 4-6. \*\*P<0.01 (Student's t-test).

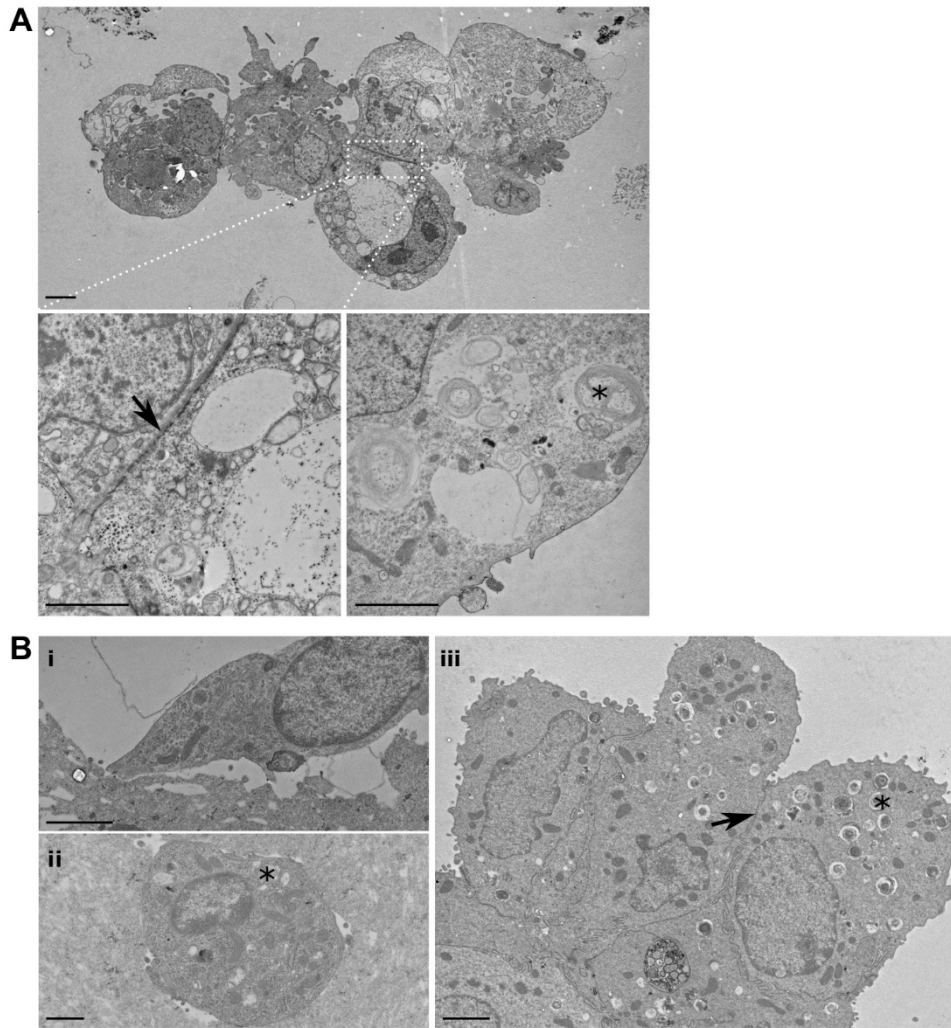

**Supplementary Figure 2. Ultrastructural analysis of lungospheres and lung organoids.** (A) Transmission electron microscopy (TEM) photograph of a lungosphere formed from unsorted lung epithelial cells in non-adherent conditions. The cells attach to each other by intercellular junctions (indicated by an arrow). Some cells contain lamellar bodies (indicated by a star). (B) TEM photographs of cells from lung organoids cultured in 3D Matrigel. The photographs show (i) ATI-like cell, (ii) AII-like cell, and (iii) club cell-like cell. Arrow, intercellular junctions; stars, lamellar bodies. Scale bars, 2  $\mu\text{m}$ .

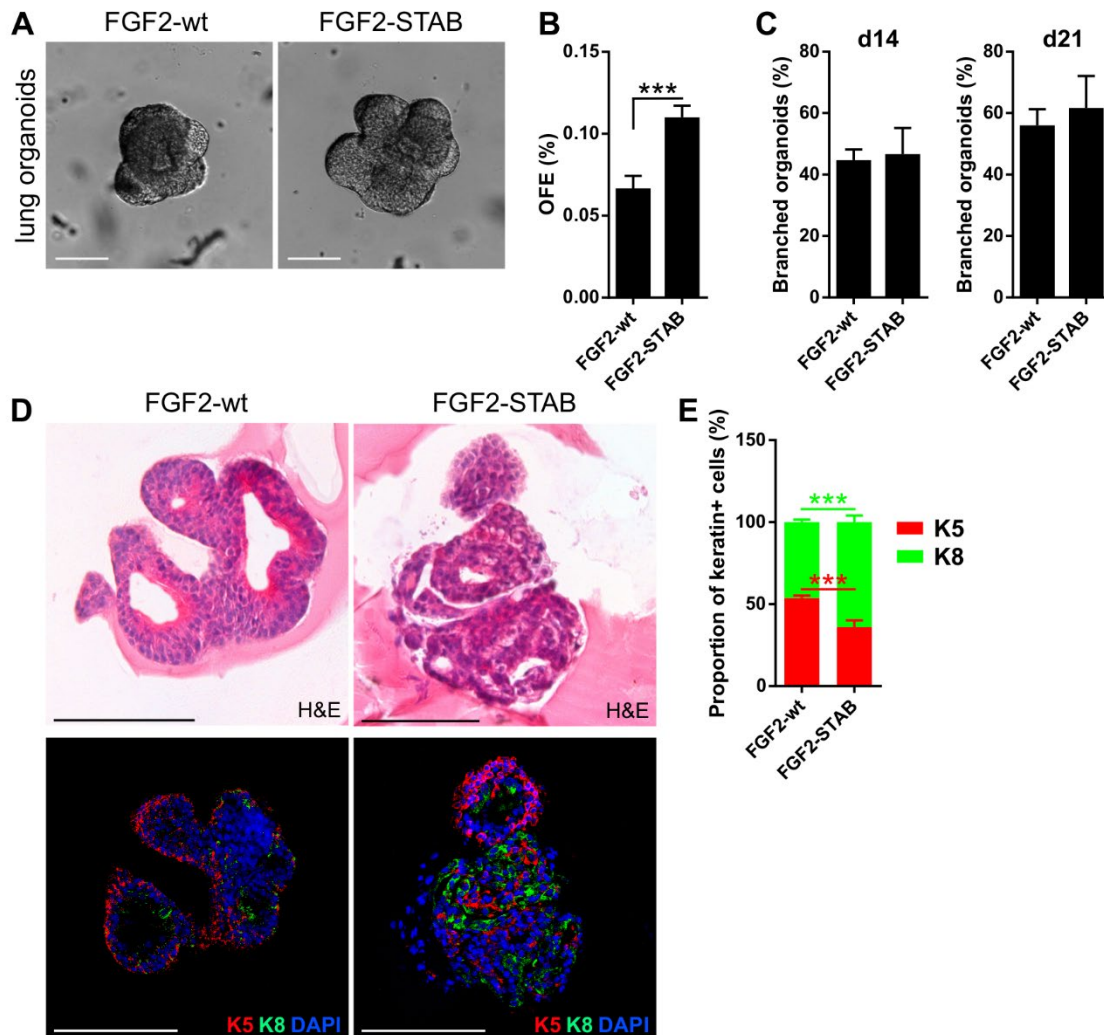

**Supplementary Figure 3. Hyperstable FGF2 promotes formation of lung organoids with higher efficiency than wild-type FGF2.** (A) Representative photographs of lung organoids formed in the presence of FGF2-wt and FGF2-STAB. Scale bars, 100  $\mu$ m. (B) The efficiency of primary lung organoid formation (OFE), shown as mean + SD; n = 3. \*\*\*P<0.001 (Student's t-test). (C) Branching efficiency (%) of lung organoids on day 14 and 21 of culture, shown as mean + SD; n = 3. (D) Hematoxylin-eosin (H&E) and immunofluorescence staining of lung organoid sections for keratin 5 (K5) and keratin 8 (K8). Scale bars, 100  $\mu$ m. (E) The plot shows proportion of K5 positive (+) or K8+ cells in the total number of keratin+ (sum of K5+ and K8+ cells) cells in the organoid sections as mean + SD; n = 3, N = 2-3 organoids per experiment. \*\*\*P<0.001 (one-way ANOVA).

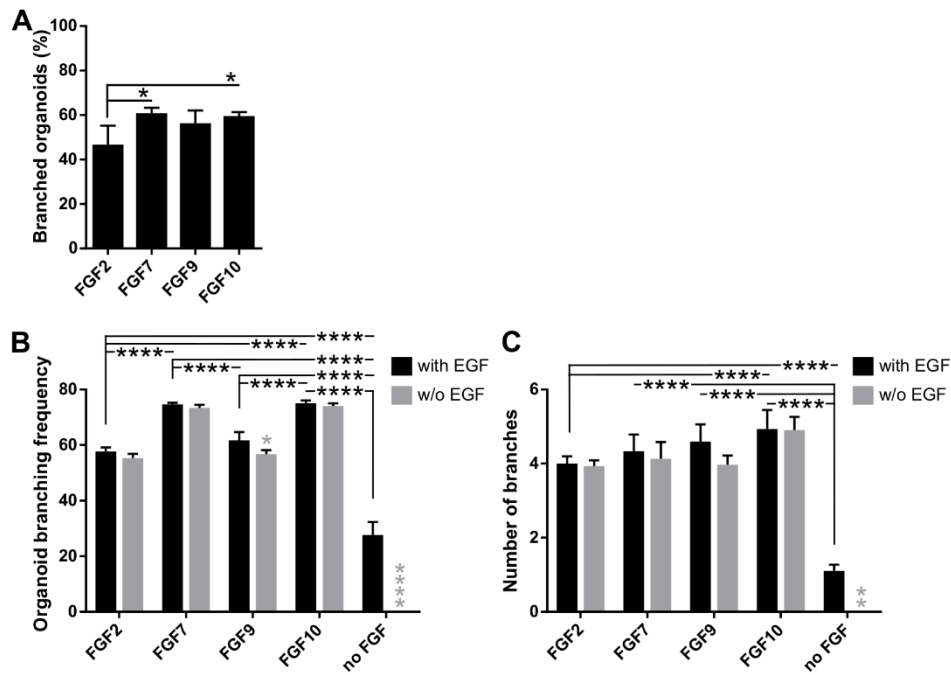

**Supplementary Figure 4. FGFs promote branching of lung organoids.** (A) Branching efficiency (%) of lung organoids on day 14 of culture, shown as mean + SD; n = 3-4. \*P<0.05 (one-way ANOVA). (B, C) The plots show organoid branching frequency (B) and number of branches (C) of organoids formed in media with different FGFs and with or without EGF as indicated. The plots show mean + SD; n = 3, N = 15-20 organoids/treatment. The grey symbols indicate significance between the culture with and without EGF for the respective FGF. \*P<0.05; \*\*P<0.01; \*\*\*\*P<0.0001 (two-way ANOVA).

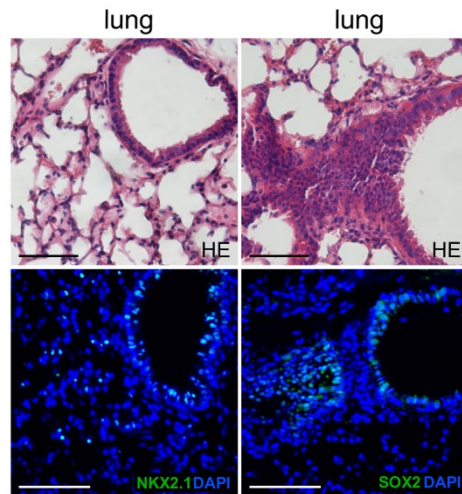

**Supplementary Figure 5. Lung tissue staining as a positive control for immunofluorescence analysis of SOX2 and NKX2-1 in lung organoids.** Paraffin sections of lung from 6 weeks old mouse were stained with hematoxylin and eosin (H&E; top panel) or by immunofluorescence for markers NKX2-1 and SOX2 (bottom panel). Blue, nuclei (DAPI). Scale bars, 100  $\mu$ m.

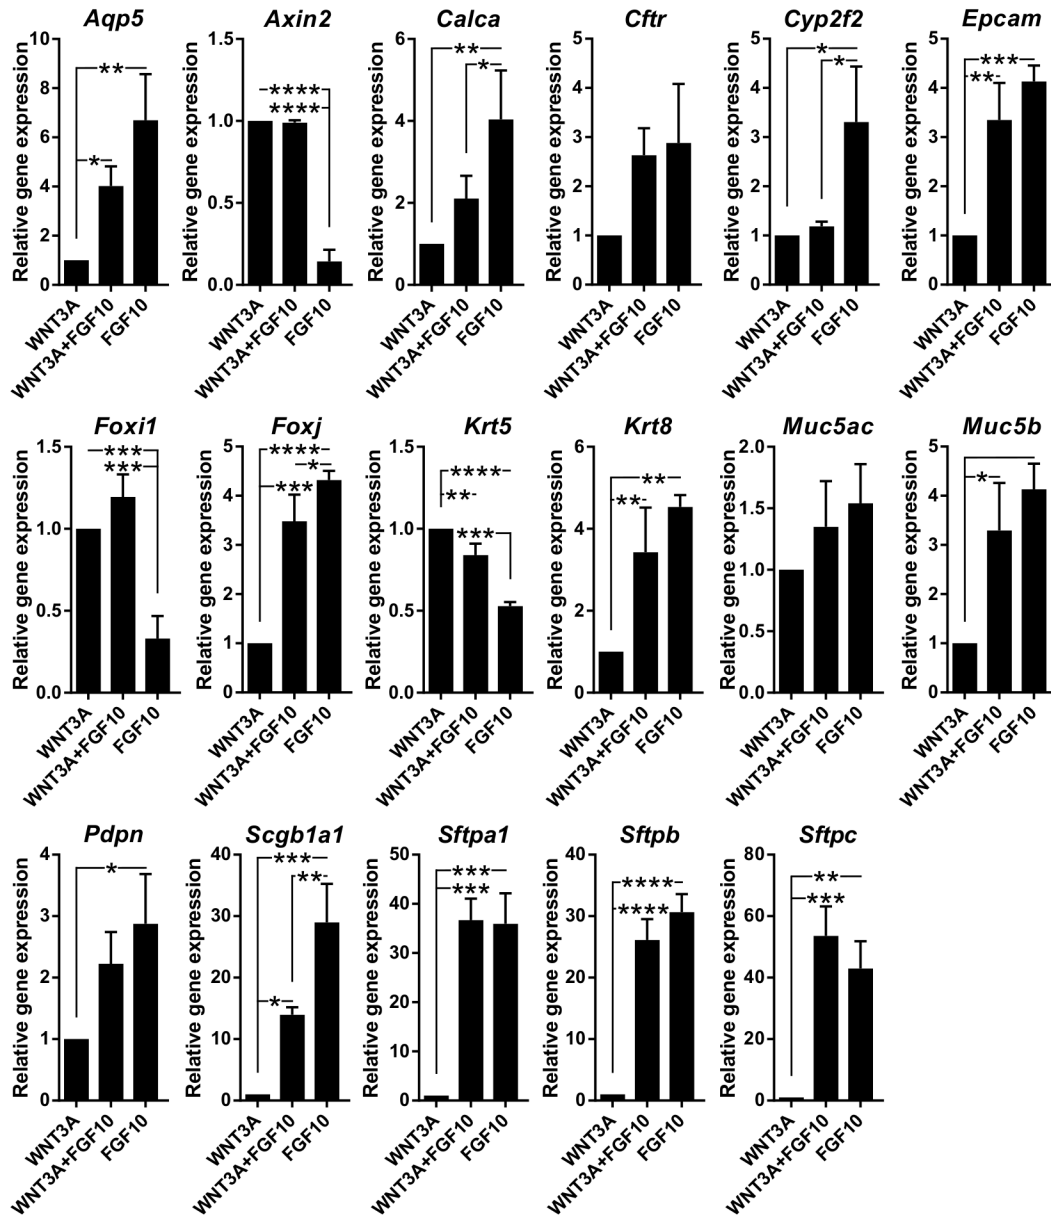

**Supplementary Figure 6. FGF10 promotes organoid differentiation.** (A) Results from qPCR analysis of expression of candidate genes in organoids grown with WNT3A, WNT3A and FGF10, or FGF10. The plots show mean + SD, n = 3. The stars indicate statistical significance between WNT3 and WNT3A+FGF10. \*P<0.05; \*\*P<0.01; \*\*\*P<0.001; \*\*\*\*P<0.0001 (one-way ANOVA). The plot is extended version of the plot in Figure 6H.

## Supplementary Tables

Supplementary Table 1. Overview of antibodies used in this study.

| Antigen                       | Clone                    | Catalog #      | Conjugate          | Host   | Supplier                    | Dilution |
|-------------------------------|--------------------------|----------------|--------------------|--------|-----------------------------|----------|
| <b>Flow cytometry:</b>        |                          |                |                    |        |                             |          |
| CD24                          | M1/69<br>monoclonal      | 48-0242-<br>82 | eFluor 450         | Rat    | eBioscience                 | 1:1000   |
| CD45                          | 30-F11<br>monoclonal     | 25-0451-<br>82 | PECy7              | Rat    | eBioscience                 | 1:1000   |
| CD49f                         | GoH3<br>monoclonal       | 12-0495-<br>82 | PE                 | Rat    | eBioscience                 | 1:1000   |
| CD104                         | 346-11A<br>monoclonal    | 123608         | Alexa Fluor<br>647 | Rat    | BioLegend                   | 1:1000   |
| EpCAM                         | G8.8<br>monoclonal       | 11-5791-<br>82 | FITC               | Rat    | eBioscience                 | 1:1000   |
| 7-AAD                         | N/A                      | 559925         | IP                 | N/A    | BD Biosciences              | 1:100    |
| <b>Immunofluorescence:</b>    |                          |                |                    |        |                             |          |
| Keratin 5                     | Poly19055<br>polyclonal  | 905504         | Unconjugated       | Rabbit | BioLegend                   | 1:200    |
| Cytokeratin 8                 | 1E8                      | 904804         | Unconjugated       | Mouse  | BioLegend                   | 1:200    |
| Keratin 14                    | Poly19053<br>polyclonal  | 905304         | Unconjugated       | Rabbit | BioLegend                   | 1:200    |
| E-cadherin                    | M168<br>monoclonal       | ab76055        | Unconjugated       | Mouse  | Abcam                       | 1:200    |
| Prosurfactant<br>protein B    | Polyclonal               | ab15011        | Unconjugated       | Rabbit | Abcam                       | 1:200    |
| Prosurfactant<br>protein C    | Polyclonal               | AB3786         | Unconjugated       | Rabbit | Millipore                   | 1:200    |
| CC10                          | T-18<br>polyclonal       | sc-9772        | Unconjugated       | Goat   | Santa Cruz                  | 1:200    |
| Aquaporin 5                   | G-19<br>polyclonal       | sc-9890        | Unconjugated       | Goat   | Santa Cruz                  | 1:100    |
| MUC5AC                        | 45M1<br>monoclonal       | MA5-<br>12178  | Unconjugated       | Mouse  | Thermo Fisher<br>Scientific | 1:100    |
| Aceylated $\alpha$<br>tubulin | 6-11B-1<br>monoclonal    | sc-23950       | Unconjugated       | Mouse  | Santa Cruz                  | 1:100    |
| Lysozyme                      | EPR2994(2)<br>monoclonal | ab108508       | Unconjugated       | Rabbit | Abcam                       | 1:200    |
| TTF1<br>(NKX2-1)              | EP1584Y<br>monoclonal    | ab76013        | Unconjugated       | Rabbit | Abcam                       | 1:400    |
| SOX2                          | Polyclonal               | ab97959        | Unconjugated       | Rabbit | Abcam                       | 1:400    |
| $\beta$ -catenin              | 12F7<br>monoclonal       | sc-59737       | Unconjugated       | Mouse  | Santa Cruz                  | 1:200    |
| Rabbit                        | N/A                      | A-11008        | Alexa Fluor<br>488 | Goat   | Life<br>Technologies        | 1:800    |



|                |              |                  |                    |             |                      |                 |
|----------------|--------------|------------------|--------------------|-------------|----------------------|-----------------|
| Rabbit         | N/A          | A-11036          | Alexa Fluor<br>568 | Goat        | Life<br>Technologies | 1:800           |
| Goat           | N/A          | A-11055          | Alexa Fluor<br>488 | Donkey      | Life<br>Technologies | 1:800           |
| <b>Antigen</b> | <b>Clone</b> | <b>Catalog #</b> | <b>Conjugate</b>   | <b>Host</b> | <b>Supplier</b>      | <b>Dilution</b> |
| Goat           | N/A          | A-11058          | Alexa Fluor<br>594 | Donkey      | Life<br>Technologies | 1:800           |
| Mouse          | N/A          | A-11031          | Alexa Fluor<br>568 | Goat        | Life<br>Technologies | 1:800           |

**Supplementary Table 2.** The primers used for qPCR.

| <b>Gene</b>    | <b>Forward primer</b>   | <b>Reverse primer</b>   | <b>Length [bp]</b> |
|----------------|-------------------------|-------------------------|--------------------|
| <i>Actb</i>    | GGCTGTATTCCCCTCCATCG    | CCAGTTGGTAACAATGCCATGT  | 154                |
| <i>Aqp5</i>    | AGAAGGAGGTGTGTTTCAGTTGC | GCCAGAGTAATGGCCGGAT     | 220                |
| <i>Axin2</i>   | TGACTCTCCTTCCAGATCCCA   | TGCCCACTAGGCTGACA       | 105                |
| <i>Calca</i>   | GAGGGCTCTAGCTTGGACAG    | AAGGTGTGAACTTGTGAGGT    | 101                |
| <i>Cfr</i>     | CCCTTCGGCGATGCTTTTTTC   | AAGCCTATGCCAAGGTAAATGG  | 166                |
| <i>Cyp2f2</i>  | GGACCCAAACCTCTCCCAATC   | CCGTGAACACCGACCCATAC    | 106                |
| <i>Eef1g</i>   | TTCCTGCCGGCAAGGTTCCA    | TGCCGCCTCTGGCGTACTTC    | 119                |
| <i>Epcam</i>   | GCGGCTCAGAGAGACTGTG     | CCAAGCATTTAGACGCCAGTTT  | 139                |
| <i>Foxi1</i>   | CCTCTCCACCATGACAGCAT    | TCCCATGGCTACTGAGGTTG    | 155                |
| <i>Foxj1</i>   | CCCTGACGACGTGGACTATG    | GCCGACAGAGTGATCTTGGT    | 114                |
| <i>Krt5</i>    | CTCTGTGTTACAAACAGTG     | CTTAGCCCGCTACCCAAACC    | 159                |
| <i>Krt8</i>    | CAAGGTGGAAGTAGAGTCCCG   | CTCGTACTGGGCACGAACTTC   | 187                |
| <i>Muc5ac</i>  | GTGGTTTGACACTGACTTCCC   | CTCCTCTCGGTGACAGAGTCT   | 103                |
| <i>Muc5b</i>   | TCCCTAGCATGAGCGCCTTA    | CCACGACGCAGTTGGATGTT    | 178                |
| <i>Pdpn</i>    | ACCGTGCCAGTGTTGTTCTG    | AGCACCTGTGGTTGTTATTTTGT | 159                |
| <i>Nkx2-1</i>  | CGCCTTACCAGGACACCAT     | GCCCATGAAGCGGGAGA       | 98                 |
| <i>Scgb1a1</i> | ATGAAGATCGCCATCACAATCAC | GGATGCCACATAACCAGACTCT  | 135                |
| <i>Sftpa1</i>  | GAGGAGCTTCAGACTGCACTC   | AGACTTTATCCCCCACTGACAG  | 103                |
| <i>Sftpb</i>   | CTGCTTCCTACCCTCTGCTG    | CTTGGCACAGGTCATTAGCTC   | 175                |
| <i>Sftpc</i>   | ATGGACATGAGTAGCAAAGAGGT | CACGATGAGAAGGCGTTTGAG   | 117                |
| <i>Sox2</i>    | GCGGAGTGGAACCTTTGTCC    | GGGAAGCGTGTACTTATCCTTCT | 156                |
| <i>Sox9</i>    | GAGCCGGATCTGAAGAAGGA    | GCTTGACGTGTGGCTTGTTTC   | 151                |
